# Supplementary material
Source: PubMed Central journal article supplement (PMC3478102)
Supplement: NIHMS410530-supplement-1_si_001.pdf [file NIHMS410530-supplement-1_si_001.pdf]

Supporting Information for

**Characterization of a Cobalt-Specific P<sub>1B</sub>-ATPase<sup>†</sup>**

Eliza L. Zielazinski,<sup>§</sup> George E. Cutsail III,<sup>§</sup> Brian M. Hoffman,<sup>§</sup> Timothy L. Stemmler,<sup>||,\*</sup> and  
Amy C. Rosenzweig<sup>§,\*</sup>

<sup>§</sup>Departments of Molecular Biosciences and of Chemistry, Northwestern University, Evanston IL  
60208, <sup>||</sup>Department of Biochemistry and Molecular Biology and the Cardiovascular Research  
Institute, Wayne State University, School of Medicine, Detroit MI 48201

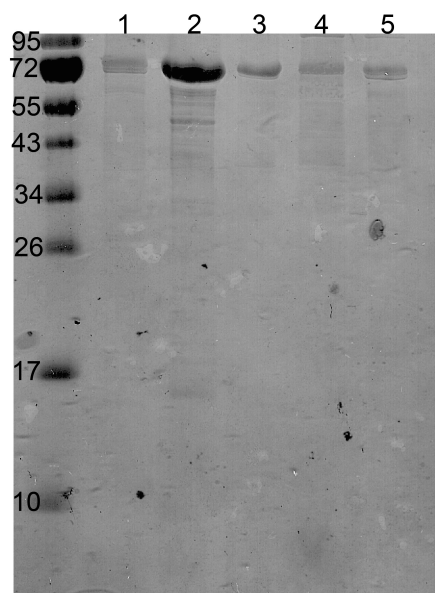

**Figure S1.** SDS-PAGE analysis of purified sCoaT mutants. Lane 1, S325A-sCoaT; lane 2, C327A-sCoaT; lane 3, H657A-sCoaT; lane 4, E658A-sCoaT; lane 5, T661A-sCoaT.
